# Supplementary material for: Cause-specific sickness absence trends by occupational class and industrial sector in the context of recent labour market changes: a Finnish panel data study
Source: PubMed Central journal article supplement — BMJ Open. 2018 Apr 7;8(4):e019822. doi: 10.1136/bmjopen-2017-019822 (PMC5892784; doi:10.1136/bmjopen-2017-019822), 2018-04-07
Supplement: bmjopen-2017-019822supp001.pdf [file bmjopen-2017-019822supp001.pdf]

**Supplementary Table 1.** Annual distribution (%) of the study population over the study period by background characteristics.

|                      | Year |      |      |      |      |      |      |      |      |
|----------------------|------|------|------|------|------|------|------|------|------|
|                      | 2005 | 2006 | 2007 | 2008 | 2009 | 2010 | 2011 | 2012 | 2013 |
| Age                  |      |      |      |      |      |      |      |      |      |
| 25-29                | 12.8 | 12.9 | 12.9 | 13.2 | 13.3 | 13.2 | 13.5 | 13.4 | 13.1 |
| 30-34                | 12.8 | 13.0 | 13.3 | 13.7 | 14.2 | 14.3 | 14.5 | 14.4 | 14.5 |
| 35-39                | 15.0 | 14.7 | 14.3 | 13.8 | 13.3 | 13.4 | 13.5 | 13.8 | 14.2 |
| 40-44                | 16.0 | 16.0 | 15.9 | 15.8 | 15.6 | 15.3 | 14.8 | 14.5 | 14.0 |
| 45-49                | 15.8 | 15.8 | 15.7 | 15.6 | 15.7 | 15.8 | 15.7 | 15.7 | 15.7 |
| 50-54                | 15.1 | 15.1 | 15.3 | 15.2 | 15.0 | 15.0 | 14.9 | 14.9 | 15.0 |
| 55-59                | 12.5 | 12.6 | 12.7 | 12.8 | 12.9 | 13.1 | 13.1 | 13.4 | 13.5 |
| Gender               |      |      |      |      |      |      |      |      |      |
| Men                  | 49.3 | 49.3 | 49.3 | 49.2 | 48.6 | 47.9 | 48.2 | 48.2 | 47.9 |
| Women                | 50.7 | 50.7 | 50.7 | 50.8 | 51.4 | 52.1 | 51.9 | 51.8 | 52.1 |
| Education            |      |      |      |      |      |      |      |      |      |
| Higher tertiary      | 12.7 | 13.1 | 13.3 | 13.7 | 14.5 | 15.0 | 15.4 | 15.7 | 16.1 |
| Lower tertiary       | 29.7 | 29.8 | 29.8 | 29.8 | 30.0 | 30.4 | 30.4 | 30.4 | 30.5 |
| Secondary            | 41.8 | 42.2 | 42.7 | 43.1 | 42.8 | 42.8 | 43.0 | 43.2 | 43.2 |
| Primary              | 15.9 | 14.9 | 14.2 | 13.5 | 12.7 | 11.8 | 11.3 | 10.8 | 10.2 |
| Occupational class   |      |      |      |      |      |      |      |      |      |
| Upper non-manual     | 24.3 | 25.2 | 25.4 | 25.6 | 26.4 | 26.9 | 25.8 | 26.0 | 26.1 |
| Lower non-manual     | 40.8 | 40.2 | 40.2 | 40.4 | 40.7 | 41.3 | 42.7 | 42.7 | 43.1 |
| Manual               | 34.9 | 34.6 | 34.3 | 34.0 | 33.0 | 31.9 | 31.5 | 31.4 | 30.9 |
| Industrial sector    |      |      |      |      |      |      |      |      |      |
| Manufacturing        | 20.1 | 19.6 | 19.5 | 19.4 | 18.8 | 17.5 | 17.2 | 17.0 | 16.4 |
| Trade                | 11.2 | 11.2 | 11.2 | 11.2 | 11.3 | 11.4 | 11.4 | 11.4 | 11.4 |
| Knowledge work       | 12.4 | 12.5 | 12.5 | 12.9 | 13.0 | 13.1 | 13.1 | 13.2 | 13.2 |
| Health & social work | 16.7 | 16.8 | 17.0 | 16.9 | 17.3 | 17.8 | 17.8 | 18.0 | 18.5 |
| Other                | 39.6 | 39.8 | 39.8 | 39.6 | 39.5 | 40.2 | 40.4 | 40.4 | 40.5 |

|                               |           |           |           |           |           |           |           |           |           |
|-------------------------------|-----------|-----------|-----------|-----------|-----------|-----------|-----------|-----------|-----------|
| Employment sector             |           |           |           |           |           |           |           |           |           |
| Private                       | 62.4      | 62.6      | 62.6      | 63.1      | 63.1      | 62.8      | 62.7      | 62.9      | 62.6      |
| Public                        | 32.2      | 31.8      | 30.4      | 29.7      | 30.2      | 30.6      | 30.1      | 30.3      | 30.6      |
| Private and public            | 4.9       | 5.1       | 6.5       | 6.6       | 6.3       | 6.1       | 6.3       | 6.1       | 6.2       |
| Transition to self-employment | 0.5       | 0.5       | 0.6       | 0.6       | 0.6       | 0.6       | 0.9       | 0.7       | 0.6       |
| Income                        |           |           |           |           |           |           |           |           |           |
| Quintile 1 (highest)          | 17.1      | 17.7      | 18.8      | 19.8      | 20.2      | 21.0      | 21.9      | 21.8      | 21.7      |
| Quintile 2                    | 17.9      | 18.9      | 19.2      | 19.5      | 20.0      | 20.8      | 21.3      | 21.1      | 21.4      |
| Quintile 3                    | 19.2      | 19.9      | 19.7      | 19.6      | 19.8      | 20.5      | 20.5      | 20.3      | 20.5      |
| Quintile 4                    | 22.5      | 21.9      | 21.2      | 20.5      | 19.9      | 19.2      | 18.1      | 18.4      | 18.3      |
| Quintile 5 (lowest)           | 23.3      | 21.6      | 21.1      | 20.6      | 20.1      | 18.4      | 18.3      | 18.5      | 18.1      |
| Employed time                 |           |           |           |           |           |           |           |           |           |
| Full year                     | 90.5      | 90.4      | 90.6      | 90.8      | 90.5      | 91.5      | 91.4      | 91.2      | 91.3      |
| 200-364 days                  | 6.8       | 7.0       | 7.1       | 6.9       | 6.5       | 6.1       | 6.4       | 6.5       | 6.3       |
| 1-199 days                    | 2.7       | 2.6       | 2.4       | 2.2       | 3.0       | 2.4       | 2.2       | 2.3       | 2.4       |
| Employment episodes           |           |           |           |           |           |           |           |           |           |
| 1                             | 90.0      | 89.5      | 88.2      | 88.3      | 89.2      | 89.3      | 88.5      | 88.9      | 89.1      |
| 2                             | 7.0       | 7.4       | 8.5       | 8.5       | 7.8       | 7.7       | 8.5       | 8.2       | 8.0       |
| 3+                            | 3.0       | 3.0       | 3.4       | 3.2       | 3.1       | 2.9       | 3.0       | 2.9       | 2.9       |
| Total                         | 100.0     | 100.0     | 100.0     | 100.0     | 100.0     | 100.0     | 100.0     | 100.0     | 100.0     |
| N                             | 1 097 598 | 1 100 322 | 1 109 041 | 1 122 238 | 1 117 179 | 1 081 698 | 1 094 294 | 1 092 208 | 1 080 951 |

**Supplementary Table 2.** Distribution (%) of the study population by sociodemographic and employment factors among those employed in different industrial sectors within different occupational classes averaging over the whole study period.

|                               | Upper non-manual        |       |                        |                               |      | Lower non-manual        |       |                        |                               |      | Manual                  |       |                        |                               |      |
|-------------------------------|-------------------------|-------|------------------------|-------------------------------|------|-------------------------|-------|------------------------|-------------------------------|------|-------------------------|-------|------------------------|-------------------------------|------|
|                               | Manu-<br>fac-<br>turing | Trade | Know-<br>ledge<br>work | Health<br>&<br>social<br>work | All  | Manu-<br>fac-<br>turing | Trade | Know-<br>ledge<br>work | Health<br>&<br>social<br>work | All  | Manu-<br>fac-<br>turing | Trade | Know-<br>ledge<br>work | Health<br>&<br>social<br>work | All  |
| <b>Age</b>                    |                         |       |                        |                               |      |                         |       |                        |                               |      |                         |       |                        |                               |      |
| 25-29                         | 7.7                     | 9.0   | 12.9                   | 9.5                           | 10.1 | 12.4                    | 18.3  | 15.1                   | 11.1                          | 13.7 | 13.6                    | 21.3  | 14.2                   | 7.1                           | 14.8 |
| 30-34                         | 15.5                    | 14.6  | 18.6                   | 12.4                          | 15.0 | 16.5                    | 16.1  | 14.5                   | 12.2                          | 13.9 | 13.6                    | 16.4  | 10.9                   | 7.7                           | 12.9 |
| 35-39                         | 19.2                    | 17.1  | 16.7                   | 13.6                          | 15.7 | 15.5                    | 15.2  | 12.7                   | 13.1                          | 13.7 | 14.0                    | 14.7  | 11.1                   | 10.3                          | 13.1 |
| 40-44                         | 18.9                    | 18.9  | 15.4                   | 15.6                          | 16.4 | 15.4                    | 15.2  | 14.6                   | 15.2                          | 15.2 | 14.9                    | 14.4  | 13.5                   | 1.4                           | 14.7 |
| 45-49                         | 15.9                    | 17.1  | 14.5                   | 17.5                          | 16.0 | 14.3                    | 13.4  | 15.3                   | 17.2                          | 15.8 | 15.2                    | 12.8  | 16.1                   | 17.6                          | 15.5 |
| 50-54                         | 12.7                    | 13.3  | 12.1                   | 17.4                          | 14.5 | 13.6                    | 11.5  | 14.7                   | 17.1                          | 15.0 | 15.5                    | 11.2  | 17.6                   | 20.9                          | 15.6 |
| 55-59                         | 10.3                    | 10.1  | 9.7                    | 14.0                          | 12.4 | 12.2                    | 10.2  | 13.1                   | 14.1                          | 12.9 | 13.1                    | 9.3   | 16.6                   | 22.3                          | 13.5 |
| <b>Gender</b>                 |                         |       |                        |                               |      |                         |       |                        |                               |      |                         |       |                        |                               |      |
| Men                           | 78.5                    | 68.5  | 65.0                   | 18.2                          | 52.0 | 56.1                    | 37.6  | 37.9                   | 7.6                           | 30.3 | 77.8                    | 79.1  | 65.0                   | 15.4                          | 69.1 |
| Women                         | 21.5                    | 31.6  | 35.0                   | 81.8                          | 48.0 | 43.9                    | 62.4  | 62.1                   | 92.4                          | 69.7 | 22.2                    | 20.9  | 35.0                   | 84.6                          | 30.9 |
| <b>Education</b>              |                         |       |                        |                               |      |                         |       |                        |                               |      |                         |       |                        |                               |      |
| Higher tertiary               | 38.2                    | 25.2  | 42.4                   | 45.0                          | 47.7 | 10.9                    | 3.0   | 9.1                    | 1.2                           | 4.7  | 0.4                     | 0.4   | 1.6                    | 0.6                           | 0.5  |
| Lower tertiary                | 46.4                    | 46.7  | 37.6                   | 48.4                          | 37.0 | 54.2                    | 32.6  | 51.2                   | 43.4                          | 44.2 | 6.5                     | 7.8   | 11.0                   | 6.7                           | 6.9  |
| Secondary                     | 11.2                    | 21.5  | 16.7                   | 5.8                           | 12.4 | 27.0                    | 47.2  | 31.0                   | 49.9                          | 41.6 | 70.3                    | 68.7  | 63.9                   | 69.3                          | 67.9 |
| Primary                       | 4.1                     | 6.7   | 3.4                    | 0.7                           | 3.0  | 7.9                     | 17.2  | 8.7                    | 5.5                           | 9.5  | 22.9                    | 23.0  | 23.4                   | 23.3                          | 24.7 |
| <b>Employment sector</b>      |                         |       |                        |                               |      |                         |       |                        |                               |      |                         |       |                        |                               |      |
| Private                       | 96.2                    | 95.6  | 81.4                   | 14.0                          | 49.0 | 97.1                    | 96.1  | 86.2                   | 17.4                          | 56.9 | 97.6                    | 95.6  | 66.3                   | 20.4                          | 80.8 |
| Public                        | 0.1                     | 0.2   | 12.1                   | 72.3                          | 41.4 | 0.2                     | 0.2   | 9.9                    | 73.3                          | 36.7 | 0.1                     | 1.3   | 27.4                   | 71.2                          | 14.7 |
| Private and public            | 3.1                     | 3.1   | 5.6                    | 12.9                          | 8.8  | 2.4                     | 3.0   | 3.4                    | 9.0                           | 6.0  | 1.9                     | 2.3   | 5.7                    | 8.2                           | 3.8  |
| Transition to self-employment | 0.6                     | 1.1   | 0.9                    | 0.9                           | 0.8  | 0.4                     | 0.7   | 0.5                    | 0.3                           | 0.5  | 0.4                     | 0.8   | 0.6                    | 0.2                           | 0.7  |



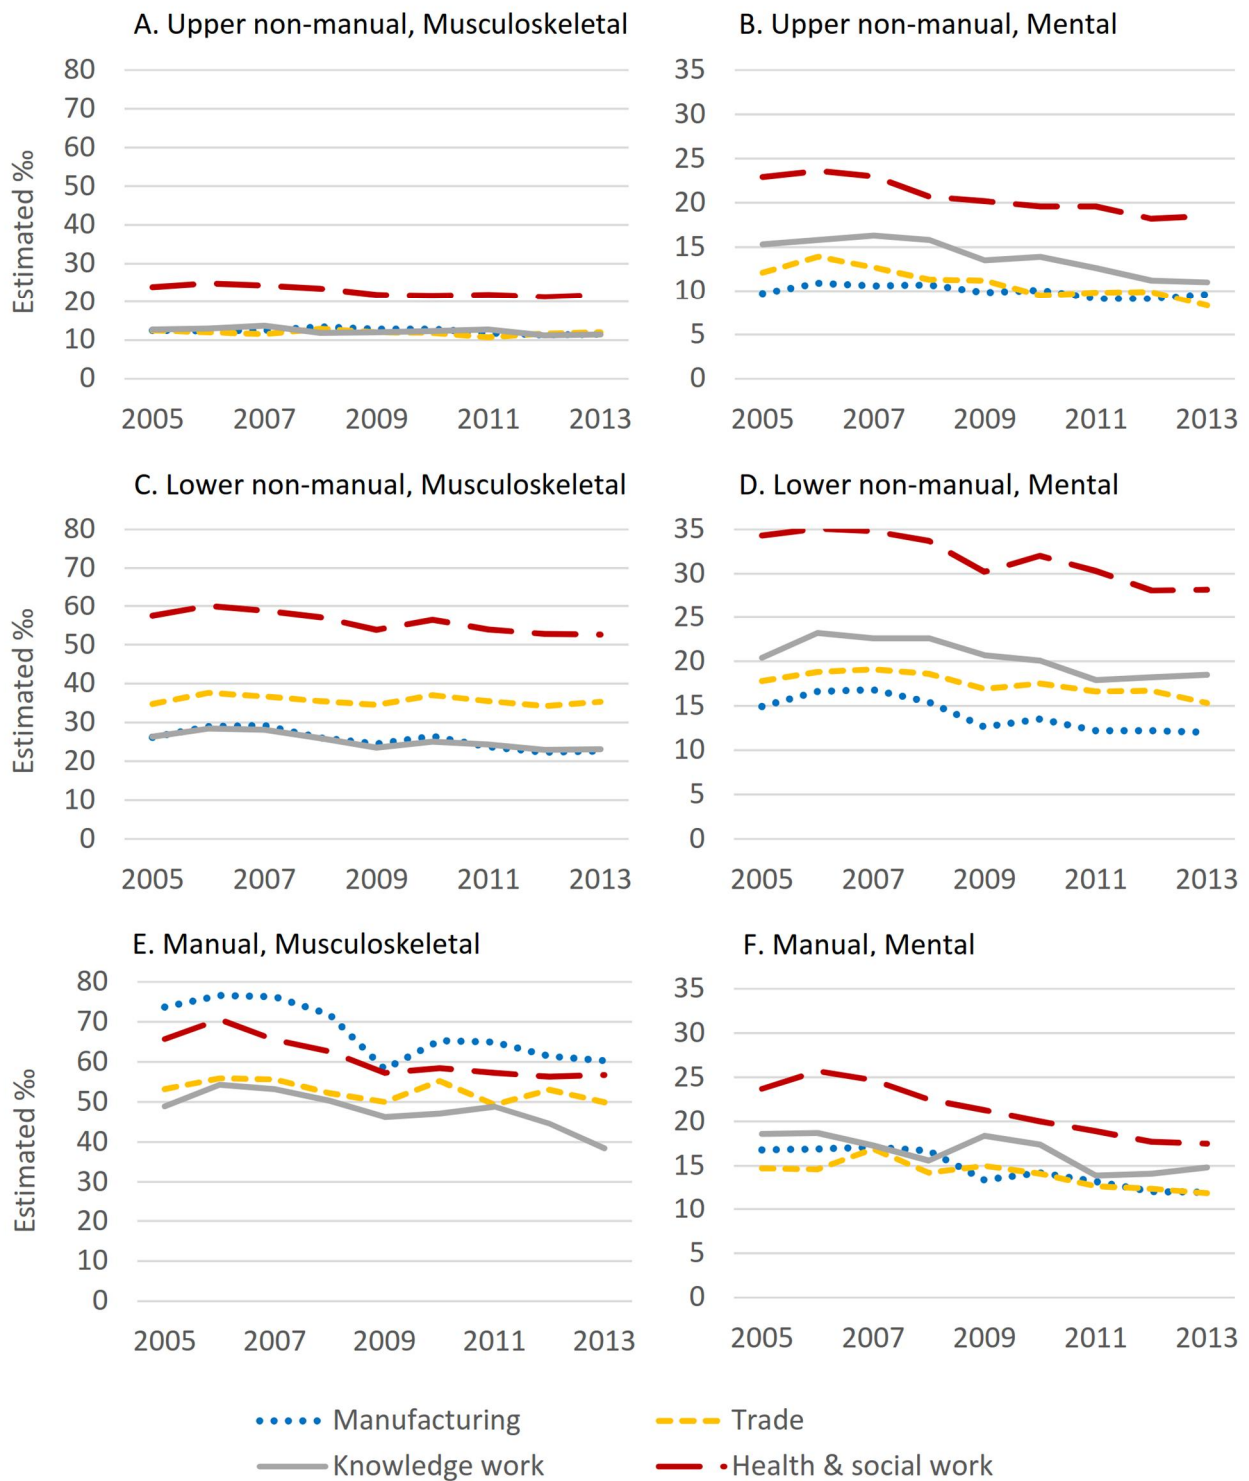

**Supplementary Figure 1.** Age- and gender-adjusted estimated annual proportion of employees with a new onset of sickness absence due to musculoskeletal diseases and mental disorders (%) by industrial sector among A-B) upper non-manual employees, C-D) lower non-manual employees, and E-F) manual workers. The panels are presented in different scales; P-values for the interaction between industrial sector and year: A) 0.302, B) 0.006, C) 0.000, D) 0.005, E) 0.000, F) 0.004.
